# Supplementary material
Source: Springer Nature journal article supplement (https://www.springermedizin.de/resource/supplementary/12891_2011_1454_MOESM4_ESM.pdf/9508302)

**Wrist**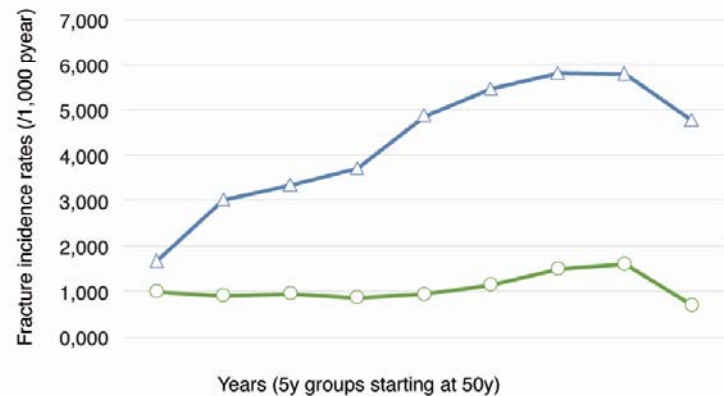**Hip**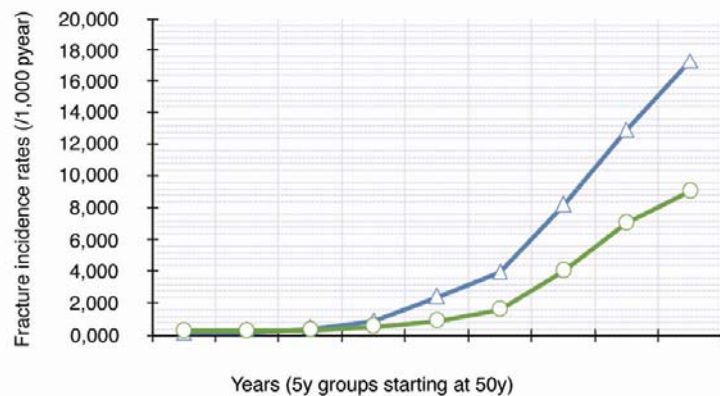**Clinical Spine**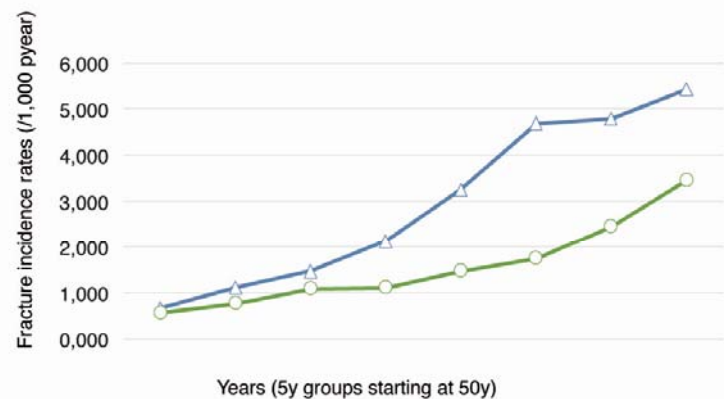**Proximal humerus**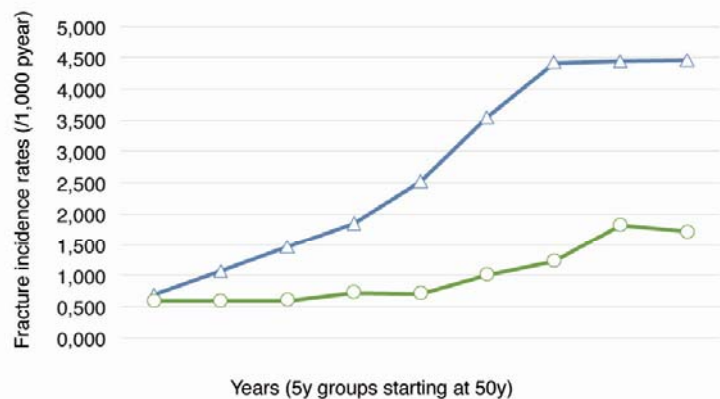**Ribs**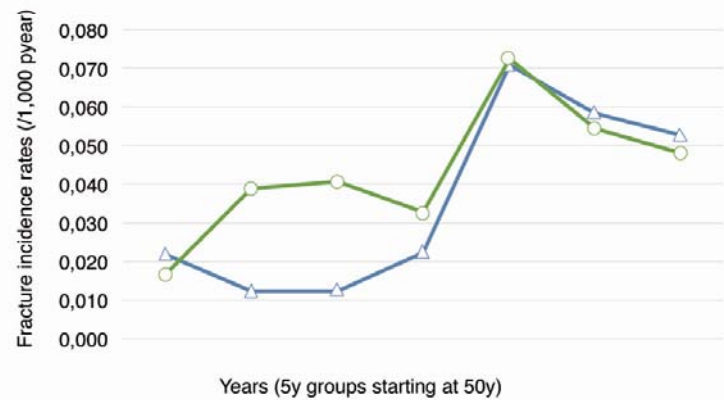**Pelvis**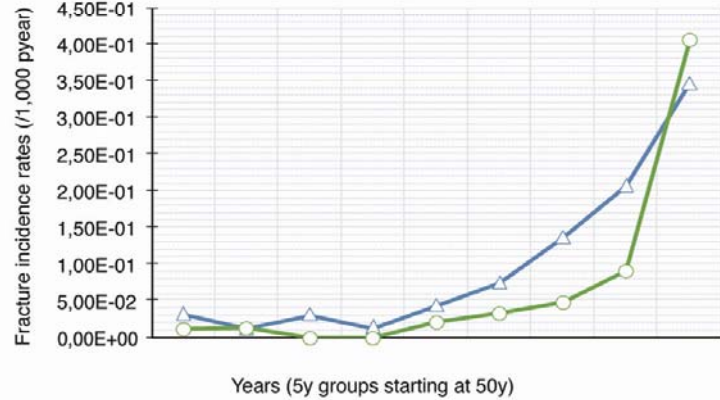

Supplement: MOESM4 [file 9508302]
